# Supplementary material for: Crystal structure of parallel G-quadruplex formed by the two-repeat ALS- and FTD-related GGGGCC sequence
Source: PubMed Central journal article supplement (PMC8191786; doi:10.1093/nar/gkab302), 2021-05-28
Supplement: gkab302_supplemental_file.pdf [file gkab302_supplemental_file.pdf]

## Supporting Information

### Crystal structure of parallel G-quadruplex formed by the two-repeat ALS and FTD related GGGGCC sequence

Yanyan Geng<sup>1†</sup>, Changdong Liu<sup>1†</sup>, Qixu Cai<sup>1†</sup>, Zhipu Luo<sup>2</sup>, Naining Xu<sup>1</sup>, Chun Po Fung<sup>1</sup>, Bing Yan<sup>1</sup>, Ning Li<sup>1</sup>, Peiyuan Qian<sup>3</sup>, Bo Zhou<sup>1,4\*</sup> and Guang Zhu<sup>1,3,5\*</sup>

<sup>1</sup> Division of Life Science, The Hong Kong University of Science and Technology, Clear Water Bay, Kowloon, Hong Kong SAR, China

<sup>2</sup> Institute of Molecular Enzymology, School of Biology & Basic Medical Sciences, Soochow University, Suzhou, Jiangsu, China

<sup>3</sup> Hong Kong Branch of Guangdong Southern Marine Science and Engineering Laboratory (Guangzhou), Hong Kong University of Science and Technology, Clear Water Bay, Kowloon, Hong Kong SAR, China

<sup>4</sup> Institute for Advanced Study, The Hong Kong University of Science and Technology, Clear Water Bay, Kowloon, Hong Kong SAR, China

<sup>5</sup> State Key Laboratory of Molecular Neuroscience, The Hong Kong University of Science and Technology, Clear Water Bay, Kowloon, Hong Kong SAR, China

\* To whom correspondence should be addressed. Tel: 852-2358-8705; Fax: (852)-2358-1552; Email: [bzhou@alumni.ust.hk](mailto:bzhou@alumni.ust.hk), [gzhu@ust.hk](mailto:gzhu@ust.hk)

† The authors wish it to be known that, in their opinion, the first 3 authors should be regarded as joint First Authors.

## Supplementary Tables and Figures

**Table S1.** The list of structural studies on the *C9orf72* d(G4C2)<sub>n</sub> DNAs.

| Sequence                           | Topology                                                                | Method                         |
|------------------------------------|-------------------------------------------------------------------------|--------------------------------|
| d(G4C2)G4                          | <i>parallel</i> in K <sup>+</sup> solution, pH7.0 <sup>1</sup>          | CD spectroscopy                |
| d(G4C2) <sub>2</sub> <sup>a*</sup> | <i>a mixture</i> in K <sup>+</sup> solution, pH7.0 <sup>1-3</sup>       | CD, NMR spectroscopy and X-ray |
| d(G4C2) <sub>2</sub> <sup>b*</sup> | <i>parallel</i> in Ba <sup>2+</sup> solution, pH7.0                     | CD spectroscopy and X-ray      |
| d(G4C2) <sub>3</sub>               | <i>a mixture</i> in K <sup>+</sup> solution, pH7.0 <sup>1</sup>         | CD spectroscopy                |
| d(G4C2) <sub>4</sub> <sup>c*</sup> | <i>antiparallel</i> in K <sup>+</sup> solution, pH7.0 <sup>1, 4-5</sup> | CD and NMR spectroscopy        |
| d(G4C2) <sub>5</sub>               | <i>a mixture</i> in K <sup>+</sup> solution, pH7.0 <sup>1</sup>         | CD spectroscopy                |

a\*, b\* In K<sup>+</sup> solution, we previously demonstrated that d(G4C2)<sub>2</sub> simultaneously can form two kinds of G-quadruplex folds, parallel and mixed parallel/antiparallel topologies, in which each fold can be separated by anion exchange chromatography<sup>2</sup>. The parallel G-quadruplex structures formed by d(G4C2)<sub>2</sub> in K<sup>+</sup> solution and Ba<sup>2+</sup> are reported in this work.

c\* The d(G4C2)<sub>4</sub> repeats, d[(G4C2)<sub>3</sub>GG<sup>B1</sup>GG], forms two monomeric four-layer antiparallel G-quadruplexes which differ in the donor-acceptor directionalities for each individual hydrogen-bonded pair in the G-quartets at pH5.8 and 7.2 respectively.

**Table S2.** Crystallographic data collection and refinement statistics

| <b>Data collection</b>              | d(G4C2) <sub>2</sub> -Ba (C222 <sub>1</sub> )  | d(G4C2) <sub>2</sub> -Ba (F222)                | d(G4C2) <sub>2</sub> -K                        |
|-------------------------------------|------------------------------------------------|------------------------------------------------|------------------------------------------------|
| Space group                         | C222 <sub>1</sub>                              | F222                                           | F222                                           |
| Wavelength (Å)                      | 0.97890                                        | 0.97913                                        | 0.97911                                        |
| Unit cell parameters (Å)            | a=60.841<br>b=110.076<br>c=56.675<br>α=β=γ=90° | a=55.613<br>b=60.817<br>c=109.605<br>α=β=γ=90° | a=57.216<br>b=61.059<br>c=110.427<br>α=β=γ=90° |
| Resolution range (Å)                | 50-1.60 (1.63-1.60)                            | 50-1.97 (2.00-1.97)                            | 50-2.38 (2.42-2.38)                            |
| No. of unique reflections           | 25435 (1165)                                   | 6636 (301)                                     | 3951 (192)                                     |
| Redundancy                          | 12.0 (9.9)                                     | 10.5 (6.5)                                     | 10.4 (8.4)                                     |
| I/σ                                 | 51.45 (2.74)                                   | 61.1 (2.2)                                     | 48.6 (4.2)                                     |
| Completeness (%)                    | 99.3 (92.8)                                    | 97.9 (93.2)                                    | 97.8 (91.4)                                    |
| R <sub>merge</sub> <sup>a</sup> (%) | 8.6 (68.6)                                     | 8.3 (87.0)                                     | 8.4 (45.5)                                     |
| Anomalous completeness (%)          | 99.1 (91.2)                                    | 97.7 (90.8)                                    | -                                              |
| Anomalous multiplicity              | 6.3 (5.2)                                      | 5.5 (3.0)                                      | -                                              |
| <b>Structure refinement</b>         |                                                |                                                |                                                |
| Resolution (Å)                      | 1.60                                           | 1.97                                           | 2.38                                           |
| R <sub>work</sub> <sup>b</sup> (%)  | 14.09                                          | 23.57                                          | 21.50                                          |
| R <sub>free</sub> <sup>c</sup> (%)  | 17.12                                          | 25.37                                          | 25.98                                          |
| RMSD bonds (Å)                      | 0.012                                          | 0.007                                          | 0.008                                          |
| RMSD angles (°)                     | 1.547                                          | 1.286                                          | 1.429                                          |
| Average B factor (Å <sup>2</sup> )  | 48.6                                           | 65.6                                           | 72.3                                           |
| No. of atoms                        |                                                |                                                |                                                |
| DNA                                 | 1494                                           | 690                                            | 766                                            |
| Water                               | 82                                             | 11                                             | 6                                              |
| ion                                 | 7                                              | 5                                              | 8                                              |

Numbers in parentheses represent the values for the highest-resolution shell.

<sup>a</sup>R<sub>merge</sub> =  $\sum |I_i - \langle I \rangle| / \sum I_i$ , where  $I_i$  is the intensity of measured reflection and  $\langle I \rangle$  is the mean intensity of all symmetry-related reflections.

<sup>b</sup>R<sub>work</sub> =  $\sum_W ||F_{\text{calc}}| - |F_{\text{obs}}|| / \sum |F_{\text{obs}}|$ , where  $F_{\text{obs}}$  and  $F_{\text{calc}}$  are observed and calculated structure factors. W is working dataset of about 95% of the total unique reflections randomly chosen and used for refinement.

<sup>c</sup>R<sub>free</sub> =  $\sum_T ||F_{\text{calc}}| - |F_{\text{obs}}|| / \sum |F_{\text{obs}}|$ , where T is a test dataset of about 5% of the total unique reflections randomly chosen and set aside prior to refinement.

**Figure S1.** (A) The initial SAD map of d(G4C2)<sub>2</sub>-Ba in C222<sub>1</sub> space group contoured at 1.0  $\sigma$ . (B) The anomalous difference map of d(G4C2)<sub>2</sub>-Ba in C222<sub>1</sub> space group contoured at 3.0  $\sigma$  and the positions of Ba<sup>2+</sup> atoms. (C) A list of orthogonal coordinates of Ba<sup>2+</sup> atoms and the height of the related peaks in anomalous difference map of d(G4C2)<sub>2</sub>-Ba (C222<sub>1</sub>).

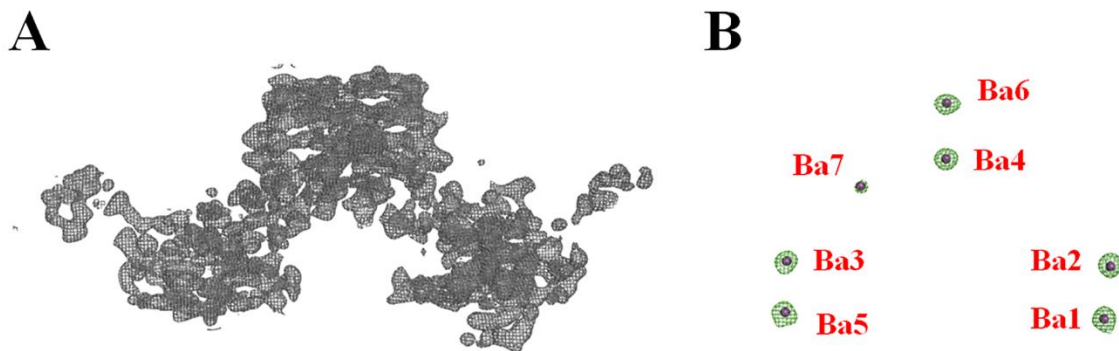

**C**

| Orders | Orthogonal coordinates (Å) |        |       | Height ( $\sigma$ ) | Ba index     |
|--------|----------------------------|--------|-------|---------------------|--------------|
| 1      | 27.55                      | 101.19 | 43.76 | 28.36               | Ba1          |
| 2      | 21.66                      | 101.07 | 46.58 | 27.79               | Ba2          |
| 3      | 21.48                      | 65.59  | 38.96 | 23.98               | Ba3          |
| 4      | 9.62                       | 83.27  | 42.13 | 23.81               | Ba4          |
| 5      | 27.29                      | 65.48  | 41.54 | 20.53               | Ba5          |
| 6      | 3.33                       | 83.29  | 42.32 | 19.81               | Ba6          |
| 7      | 9.66                       | 82.56  | 42.07 | 13.94               | close to Ba4 |
| 8      | 3.30                       | 82.56  | 42.29 | 11.77               | close to Ba6 |
| 9      | 13.50                      | 73.52  | 45.03 | 5.51                | Ba7          |

**Figure S2.** (A) The initial SAD map of d(G4C2)<sub>2</sub>-Ba in F222 space group contoured at 1 $\sigma$ . (B) The anomalous difference map of d(G4C2)<sub>2</sub>-Ba in F222 space group contoured at 3 $\sigma$  and the positions of Ba<sup>2+</sup> atoms. (C) A list of orthogonal coordinates of Ba<sup>2+</sup> atoms and the height of the related peaks in anomalous difference map of d(G4C2)<sub>2</sub>-Ba (F222).

**A**

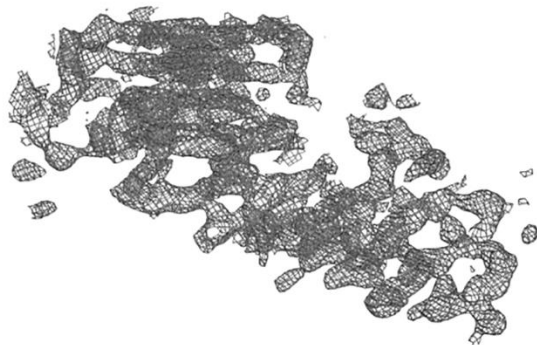

**B**

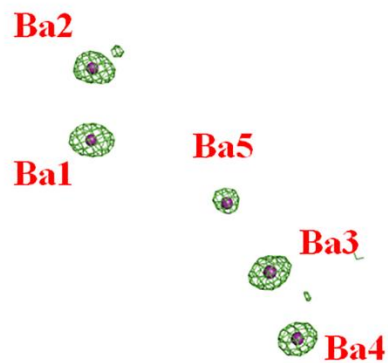

**C**

| Orders | Orthogonal coordinates (Å) |        |        | Height ( $\sigma$ ) | Ba index     |
|--------|----------------------------|--------|--------|---------------------|--------------|
| 1      | -13.90                     | 12.02  | -27.40 | 24.5                | Ba4          |
| 2      | -13.90                     | 5.56   | -27.40 | 19.85               | Ba3          |
| 3      | -15.00                     | -12.24 | -9.62  | 18.40               | Ba2          |
| 4      | -17.82                     | -6.40  | -9.74  | 18.18               | Ba1          |
| 5      | -19.90                     | -11.98 | -9.89  | 8.08                | close to Ba3 |
| 6      | -11.57                     | 1.70   | -18.32 | 5.51                | Ba5          |

**Figure S3.** The crystal structure of  $d(G4C2)_2$ -Ba in  $C222_1$  space group. (A) An asymmetric unit of  $d(G4C2)_2$  in  $Ba^{2+}$  (purple spheres) contains 6 chains, A-F. The observed non-central channel  $Ba^{2+}$  shown by arrow. (B) Crystal packing of  $d(G4C2)_2$ -Ba ( $C222_1$ ). The Form-1/7 formed by chains A/B and Form-1/1 formed by chains C/D or chains E/F are indicated by dashed rectangles.

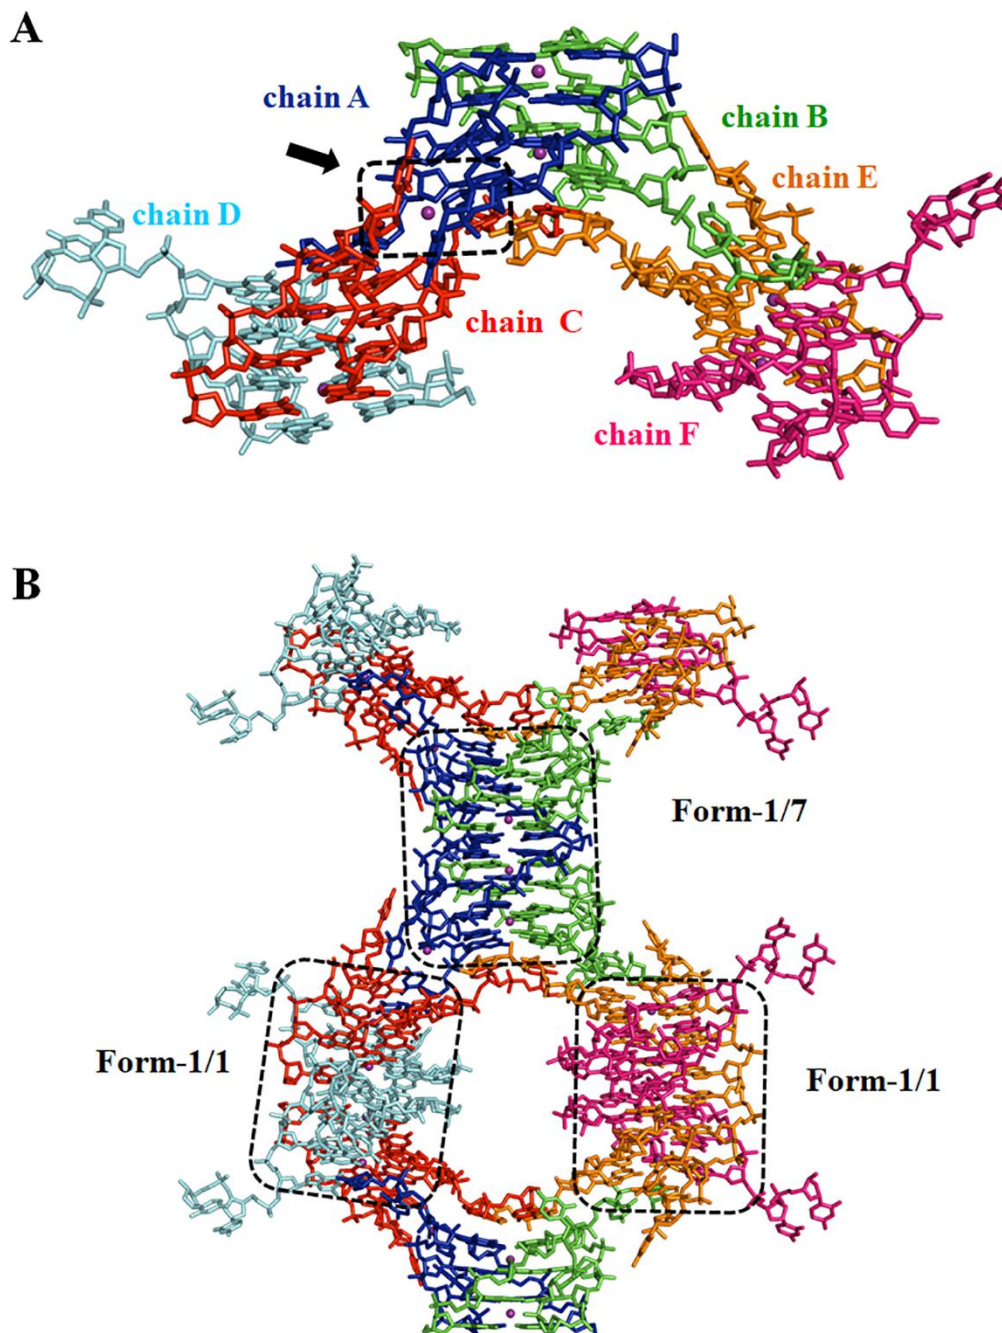

**Figure S4.** The G-tetrad base stacking mode at the interface of two dimeric block in the tetrameric G-quadruplex crystal structure of d(G4C2)<sub>2</sub>-Ba (C222<sub>1</sub>). (A) and (B) represent Form-1/7 and Form-1/1 with different colors for each of the four strands, respectively. The hydrogen bonds are represented by solid black lines.

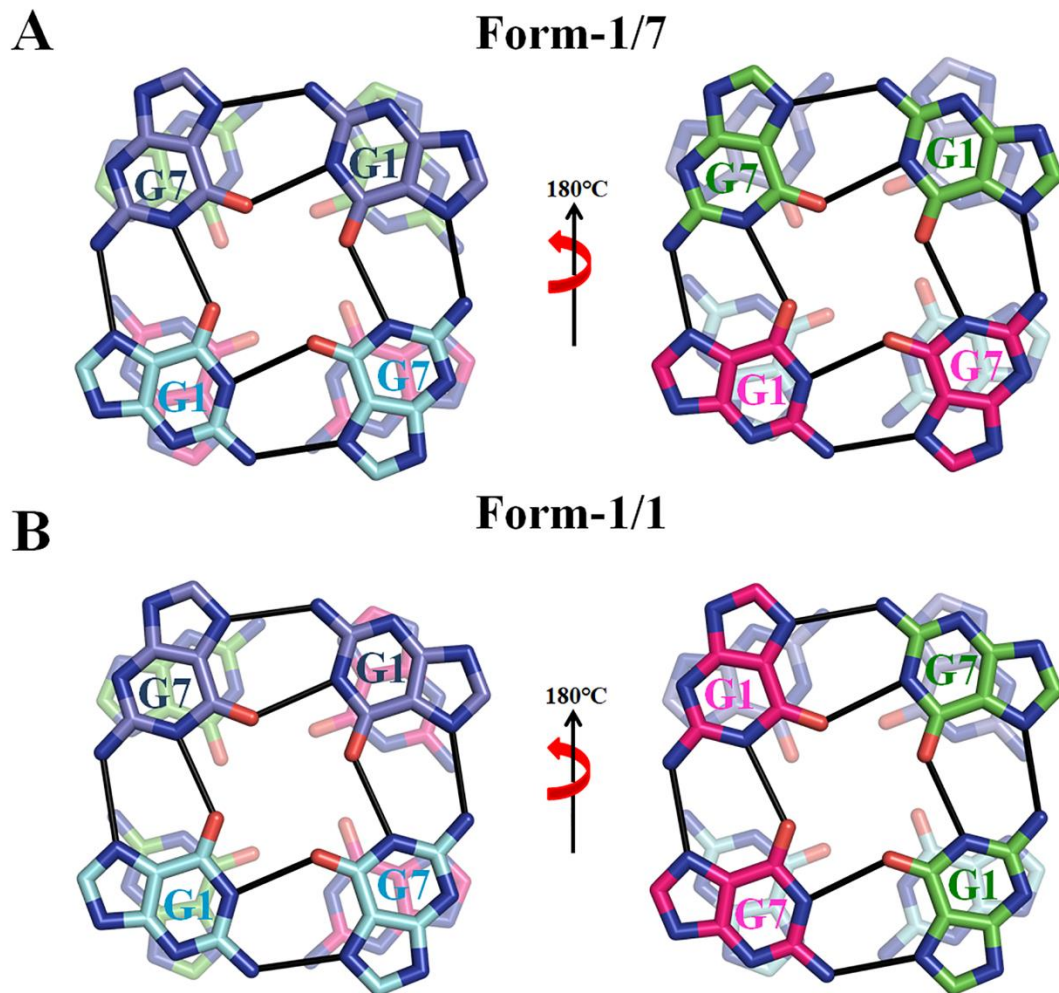



**Figure S5.** Left: The electron density corresponds to the final 2mFo-DFc map contoured at 1.0  $\sigma$  for d(G4C2)<sub>2</sub>-Ba (C222<sub>1</sub>). Right: Expanded view of the environment of the Ba<sup>2+</sup> ions in the tetrameric G-quadruplex formed by d(G4C2)<sub>2</sub>, with the bonds between Ba<sup>2+</sup> and oxygen atom shown as solid black lines. (A) and (B) represent Form-1/7 and Form-1/1 with carbon atoms colored different for each of the four strands, respectively.

**A**

**Form-1/7**

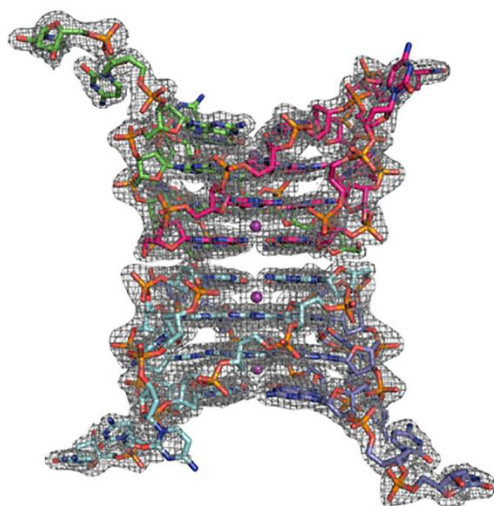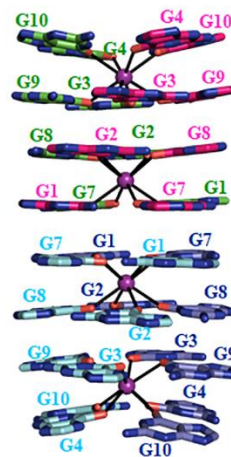

**B**

**Form-1/1**

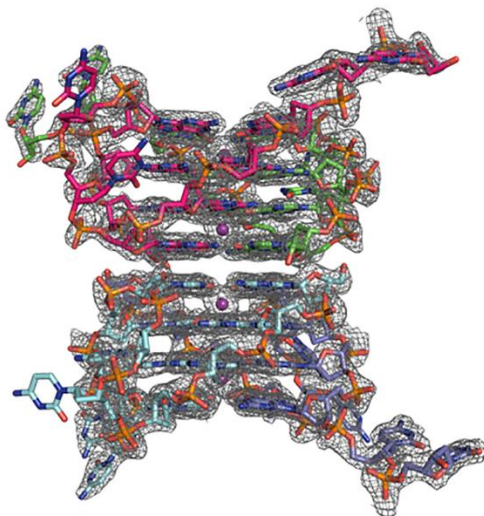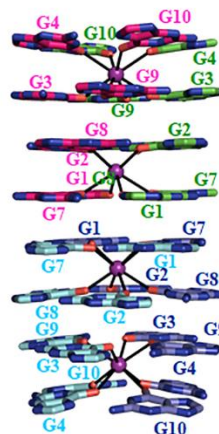



**Figure S6.** The view of the additional  $\text{Ba}^{2+}$  ion observed in the crystal structure of  $\text{d}(\text{G4C2})_2\text{-Ba}$  ( $\text{C222}_1$ ). The hydrogen bonds are represented by solid black lines. Water molecules are colored red and  $\text{Ba}^{2+}$  atom is in purple sphere.

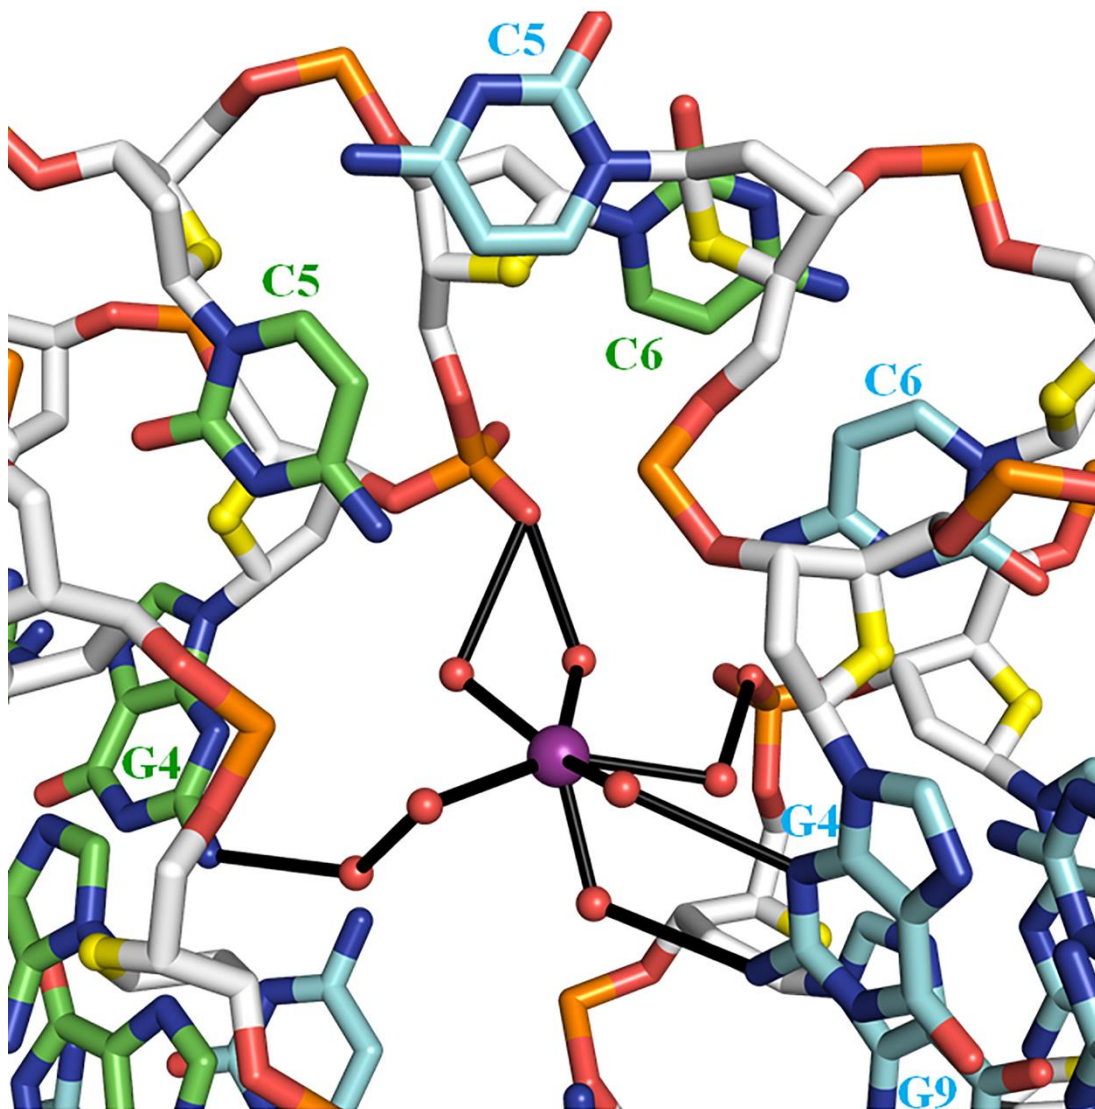

**Figure S7.** The view of the cytosines in the crystal structure of d(G4C2)<sub>2</sub>-Ba (C222<sub>1</sub>). The C5, C6, C11 and C12 bases in (A) the Form-1/7 formed by chains A/B, (B) Form-1/1 formed by chains C/D and (C) Form-1/1 formed by chains E/F. The electron density corresponds to the final 2mFo-DFc map contoured at 1.0  $\sigma$ . The G-tetrad core of the tetrameric G-quadruplex is shown in surface mode with the atoms of phosphate and phosphate oxygen colored in red.

**A**

**Form-1/7 formed by chain A and B**

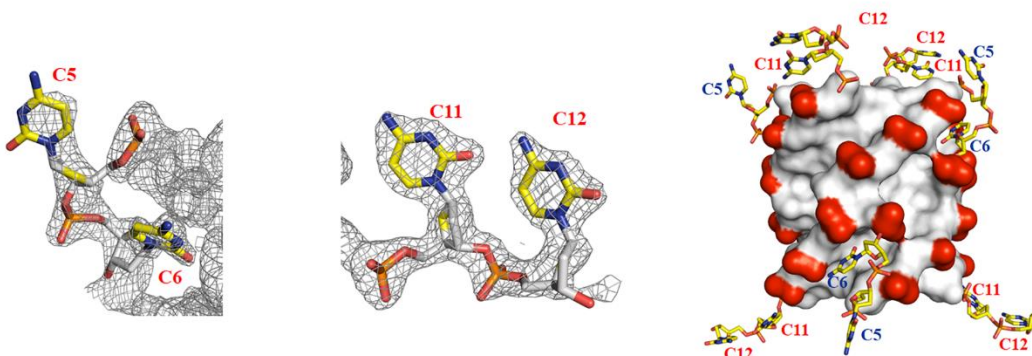

**B**

**Form-1/1 formed by chain C and D**

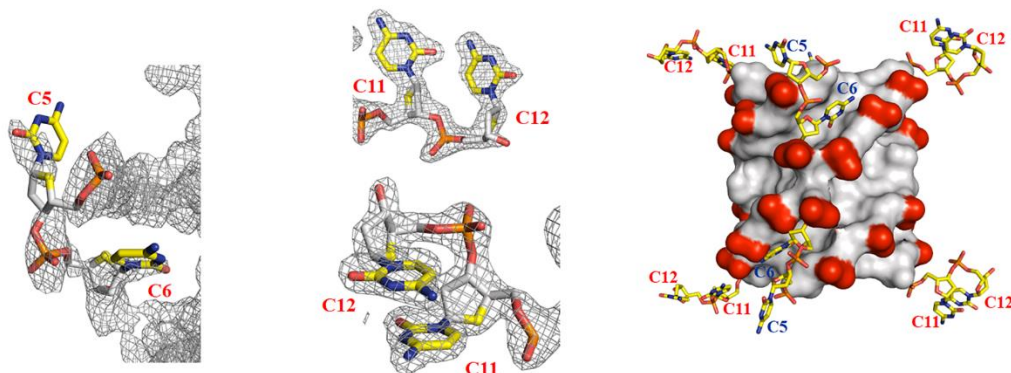

**C**

**Form-1/1 formed by chain E and F**

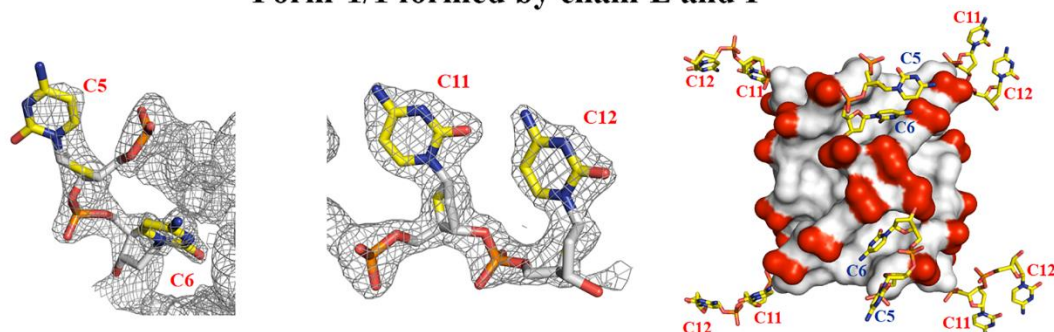

**Figure S8.** The crystal structure of  $d(G4C2)_2$  in  $K^+$  solution in F222 space group. (A) An asymmetric unit of  $d(G4C2)_2$  in  $K^+$  (magenta spheres) solution contains 3 chains, A-C. (B) Crystal packing of  $d(G4C2)_2$ -K. The Form-1/7 and Form-1/1 are indicated by dashed rectangle.

**A**

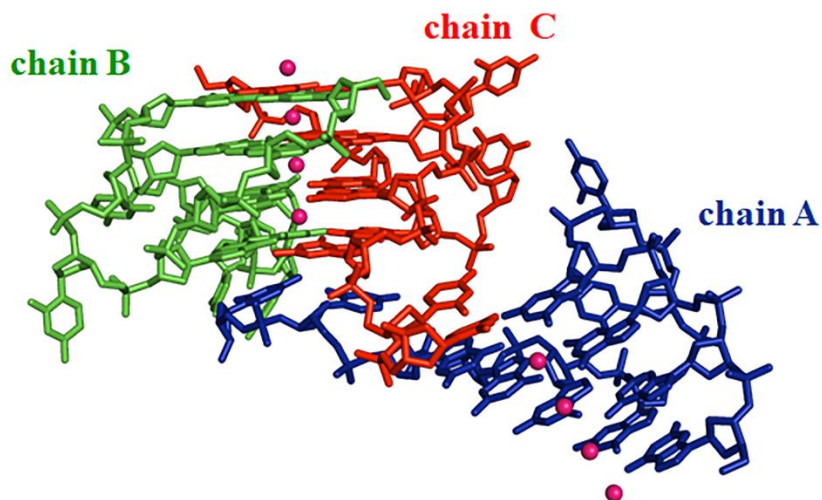

**B**

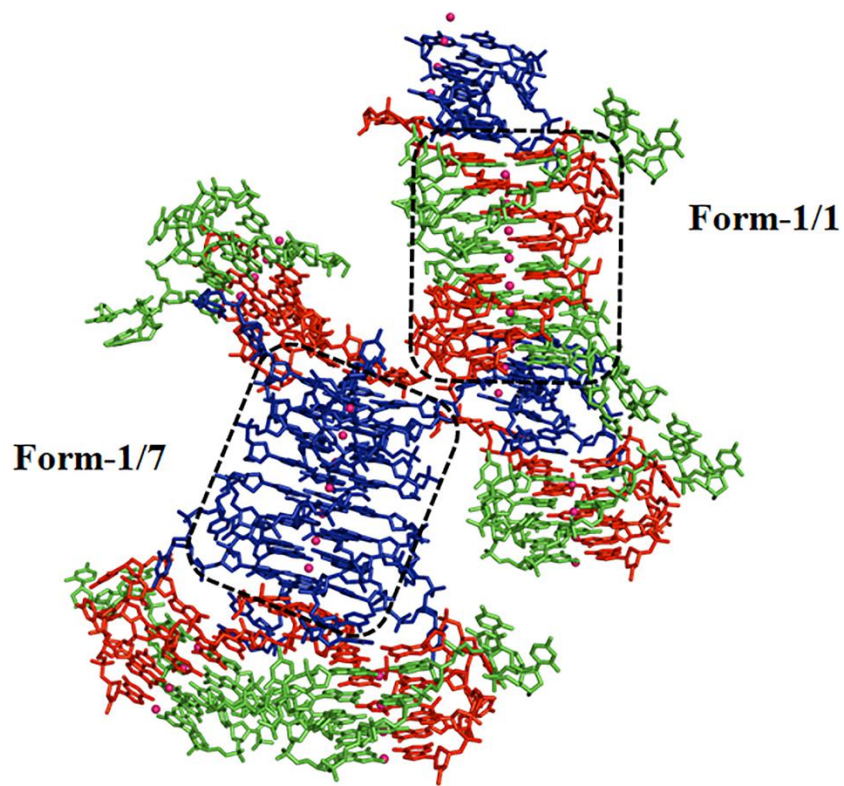



**Figure S9.** The crystal structure of  $d(G4C2)_2$  in  $Ba^{2+}$  solution in F222 space group. (A) An asymmetric unit of  $d(G4C2)_2$  in  $Ba^{2+}$  (purple spheres) solution contains 3 chains, A-C. (B) Crystal packing of  $d(G4C2)_2$ -Ba (F222). The Form-1/7 and Form-1/1 are indicated by dashed rectangle.

**A**

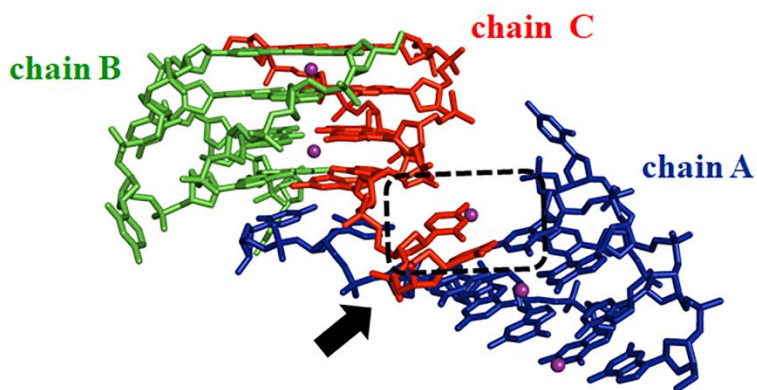

**B**

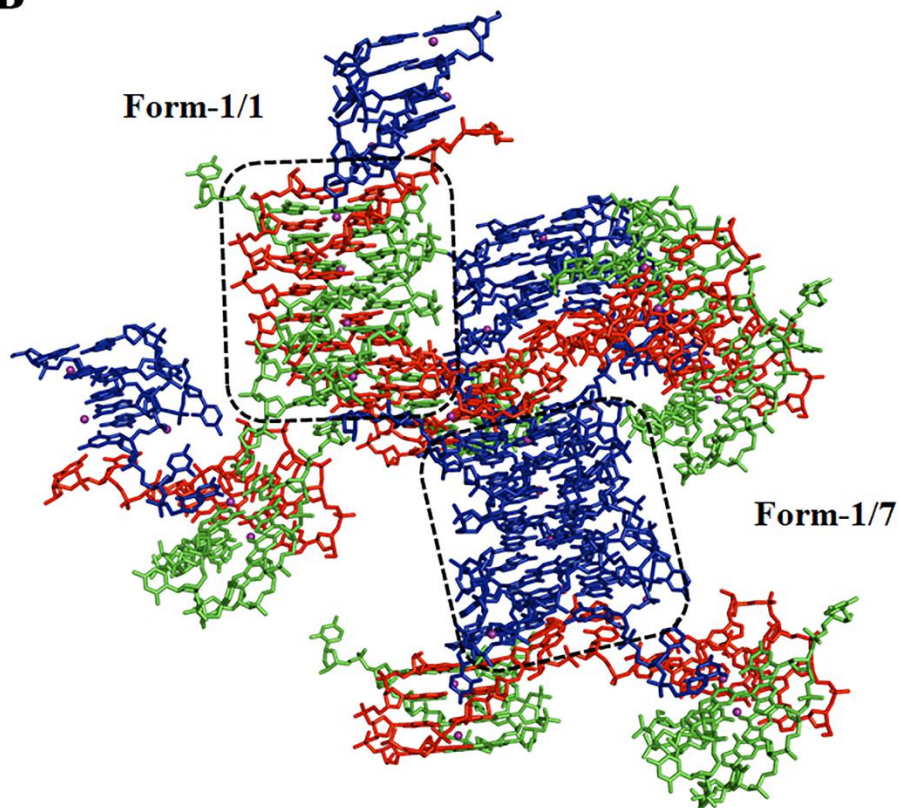

**Figure S10.** Crystal structure of  $d(G4C2)_2$ -Ba in F222 space group. (A) Form-1/7 and (B) Form-1/1 in which each dimeric block is stacked to form a tetrameric G-quadruplex via different 5'-arrangements and stabilized by  $Ba^{2+}$  (purple sphere). Left: Cartoon representation of tetrameric G-quadruplex formed by  $d(G4C2)_2$ . Middle: Schematic representation of topology adopted by  $d(G4C2)_2$ . Right: Top view of Left. Each molecule,  $d(G4C2)_2$ , is shown as red, green, blue and cyan in the tetrameric G-quadruplex. O4' oxygens are in yellow. Dashes represent the missing residues, the CC loops.

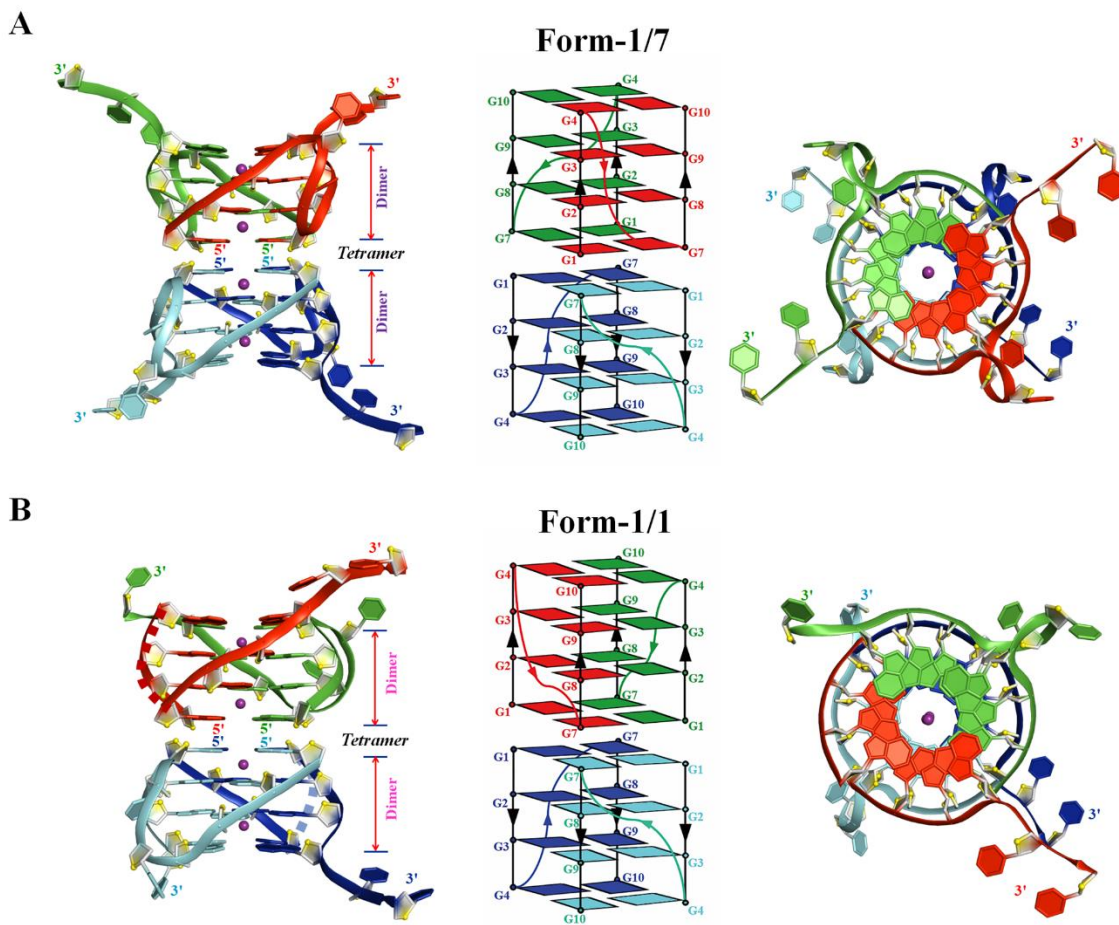

**Figure S11.** Left: The electron density corresponds to the final 2mFo-DFc map contoured at 1.0  $\sigma$  for d(G4C2)<sub>2</sub>-K. Right: Expanded view of the environment of the K<sup>+</sup> ions in the tetrameric G-quadruplex formed by d(G4C2)<sub>2</sub>, with the bonds between K<sup>+</sup> and oxygen atom shown as solid black lines. (A) and (B) represent Form-1/7 and Form-1/1 with carbon atoms colored different for each of the four strands, respectively.

**A**

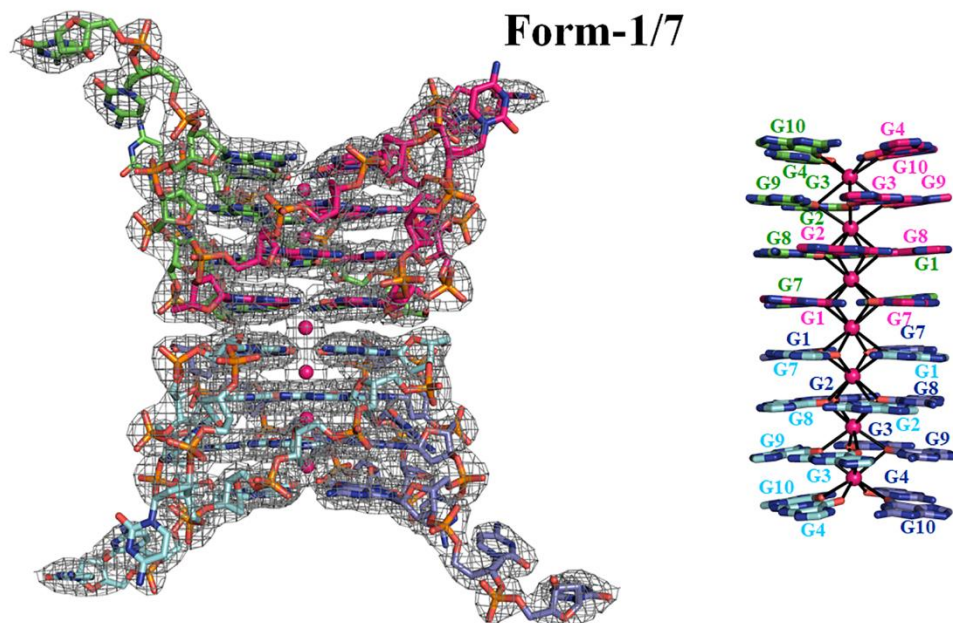

**B**

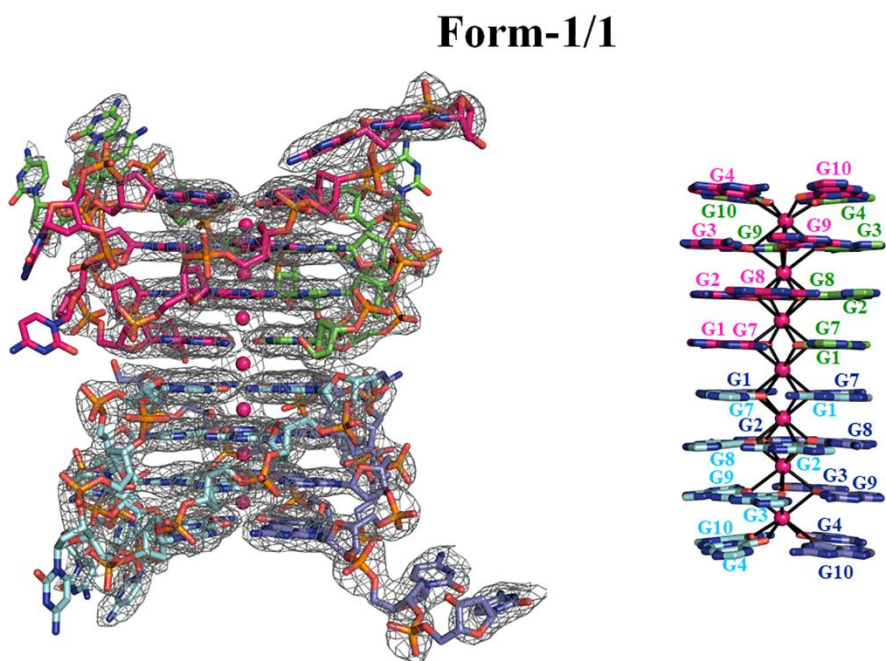



**Figure S12.** The view of the cytosines in the crystal structure of d(G4C2)<sub>2</sub>-K. The C5, C6, C11 and C12 bases in (A) the Form-1/7 formed by chain A and its crystallographically symmetric molecules, (B) Form-1/1 formed by chains B/C and their crystallographically symmetric molecules. The electron density corresponds to the final 2mFo-DFc map contoured at 1.0  $\sigma$ . The G-tetrad core of the tetrameric G-quadruplex is shown in surface mode with the atoms of phosphate and phosphate oxygen colored in red..

**A**

**K-Form-1/7 formed by chain A**

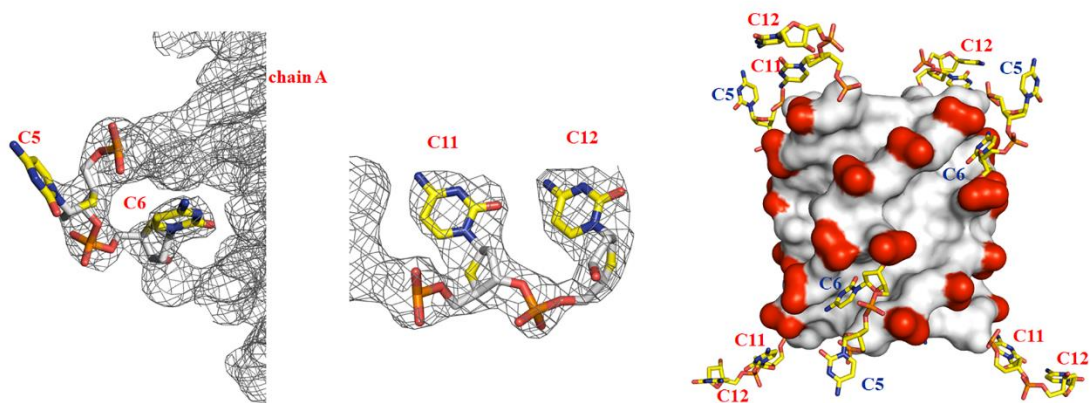

**B**

**Form-1/1 formed by chain B and chain C**

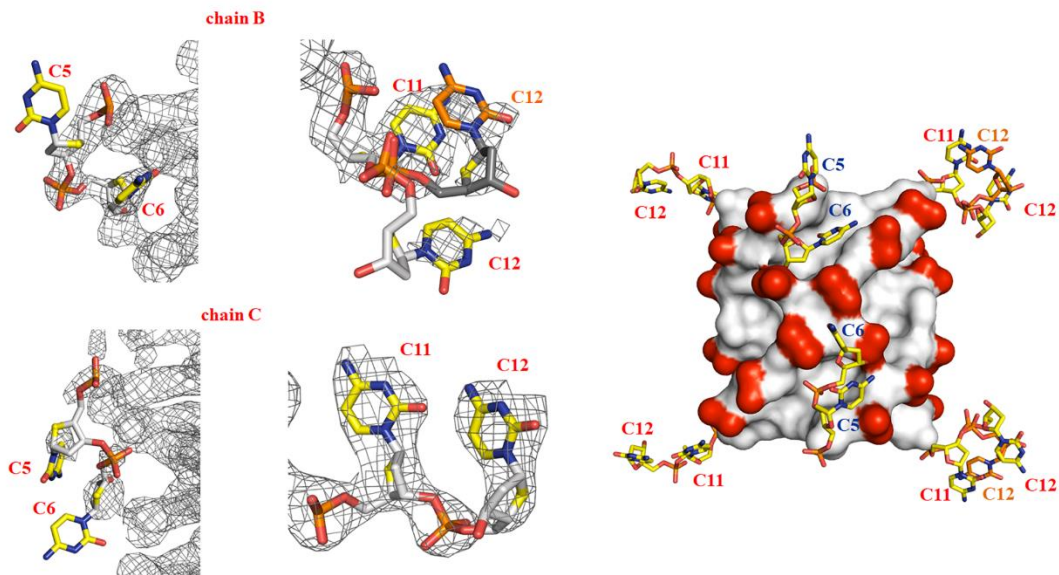

**Figure S13.** Detailed conformations of cytosines in the structure of d(G4C2)<sub>2</sub>-Ba (F222). The conformation of propeller loop, C5 and C6, in the dimeric G-quadruplex of (A) Form-1/7 and (B) Form-1/1. (C) The conformation of the C11 and C12 bases of chain C forming Form-1/1 located at the 3'- end. (D) The conformation of the C11 and C12 bases of chain A (yellow) forming Form-1/7 and B (green) forming Form-1/1. The hydrogen bonds are represented by solid black lines.

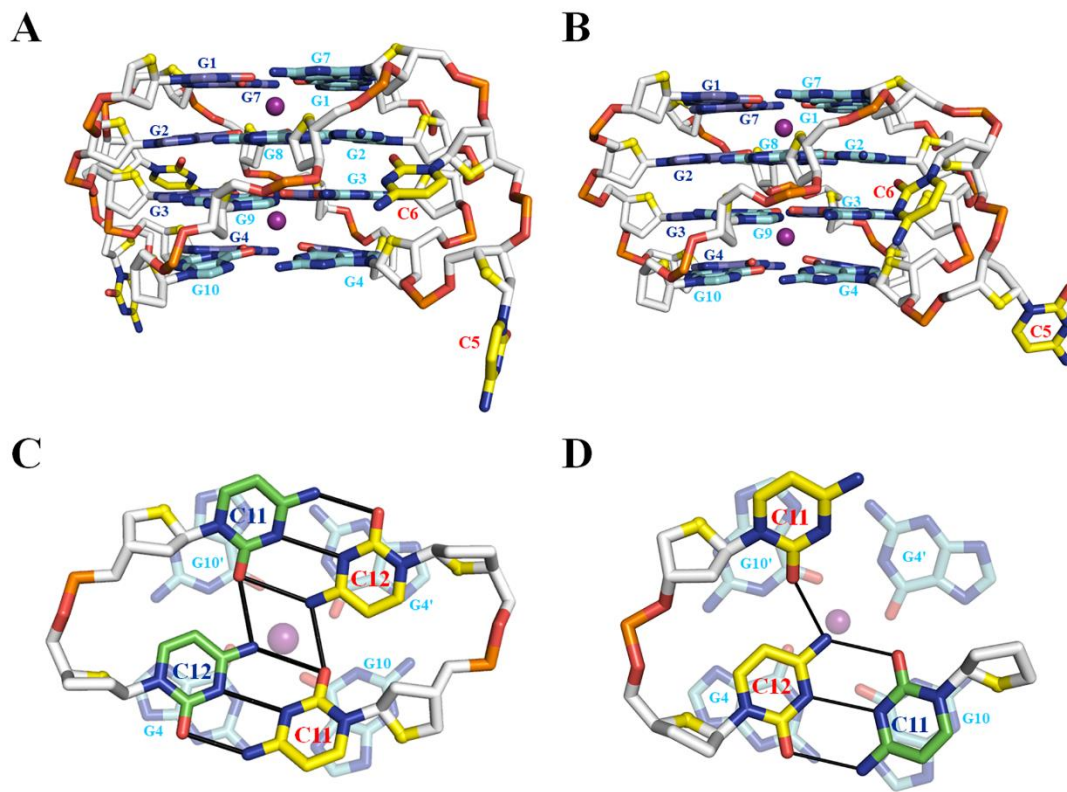

**Figure S14.** Intermolecular  $\pi$ - $\pi$  packing interactions for cytosine bases observed in the structure of (A) d(G4C2)<sub>2</sub>-Ba (F222) Form-1/7 formed by chain A and (B) d(G4C2)<sub>2</sub>-K Form-1/7 formed by chain A. The prime (') notation signifies that the two bases belong to separate oligonucleotide strands.

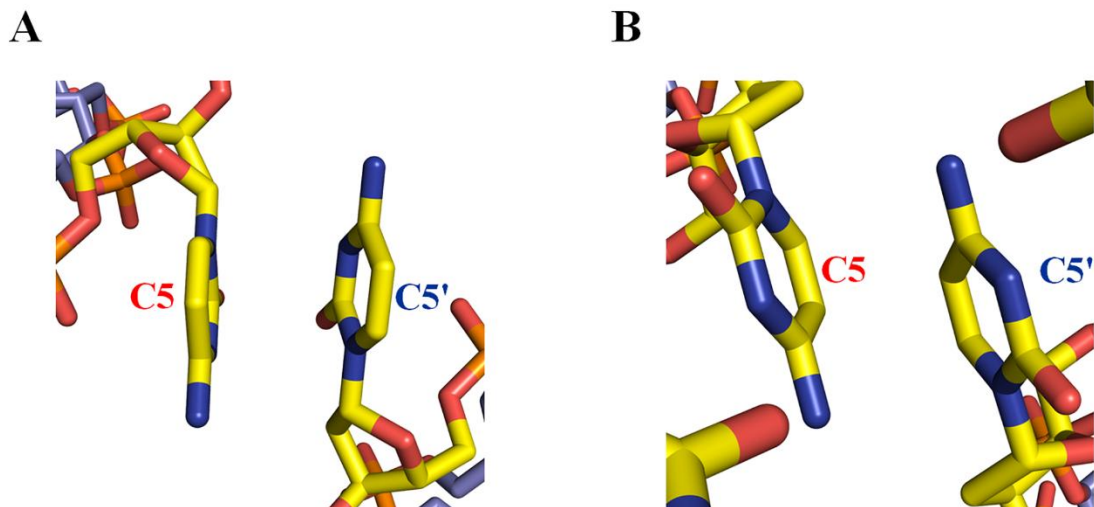

## References

1. Zhou, B.; Liu, C.; Geng, Y.; Zhu, G., Topology of a G-quadruplex DNA formed by C9orf72 hexanucleotide repeats associated with ALS and FTD. *Scientific reports* **2015**, *5*, 16673.
2. Zhou, B.; Geng, Y. Y.; Liu, C. D.; Miao, H. T.; Ren, Y. G.; Xu, N. N.; Shi, X.; You, Y. Y.; Lee, T. L.; Zhu, G., Characterizations of distinct parallel and antiparallel G-quadruplexes formed by two-repeat ALS and FTD related GGGGCC sequence. *Scientific reports* **2018**, *8*.
3. Sket, P.; Pohleven, J.; Kovanda, A.; Stalekar, M.; Zupunski, V.; Zalar, M.; Plavec, J.; Rogelj, B., Characterization of DNA G-quadruplex species forming from C9ORF72 G4C2-expanded repeats associated with amyotrophic lateral sclerosis and frontotemporal lobar degeneration. *Neurobiol Aging* **2015**, *36* (2), 1091-6.
4. Brcic, J.; Plavec, J., Solution structure of a DNA quadruplex containing ALS and FTD related GGGGCC repeat stabilized by 8-bromodeoxyguanosine substitution. *Nucleic Acids Res* **2015**, *43* (17), 8590-8600.
5. Brcic, J.; Plavec, J., NMR structure of a G-quadruplex formed by four d(G4C2) repeats: insights into structural polymorphism. *Nucleic Acids Res* **2018**, *46* (21), 11605-11617.
